# Supplementary material for: Network approaches and interventions in healthcare settings: A systematic scoping review
Source: PubMed Central journal article supplement (PMC9949682; doi:10.1371/journal.pone.0282050), 2023-02-23
Supplement: pone.0282050.s002.pdf [file pone.0282050.s002.pdf]

**S2 Table. Types of network ties**

| Types of ties                                       | Words included                         |                                          |                             |                                                     |                                                       |                  |
|-----------------------------------------------------|----------------------------------------|------------------------------------------|-----------------------------|-----------------------------------------------------|-------------------------------------------------------|------------------|
| Advice/mentoring                                    | Advice                                 | Advice seeking                           | Mentee-mentor relationships |                                                     |                                                       |                  |
| Information and knowledge exchange/sharing/transfer | Information exchange                   | Knowledge sharing                        | Information sharing         | Knowledge exchange                                  | knowledge transfer                                    | Influence        |
| Communication/discussion                            | communication                          | Discussion                               | Supportive supervision      | Email communication                                 | Patterns of team interaction                          |                  |
| Two-mode networks                                   | Affiliation                            | Individual affiliation to surgical cases | Shared benefactors          | 2-mode network of forum users by discussion threads | 2-mode networks of professionals by services provided |                  |
| Coordination/collaboration                          | Coordination                           | Cooperation                              | Collaboration               |                                                     |                                                       |                  |
| Problem solving                                     | Problem solving                        | Problem solving                          |                             |                                                     |                                                       |                  |
| Patient sharing/referrals                           | Patient-sharing physicians peer groups | Patient-related contacts                 | Referrals                   |                                                     |                                                       |                  |
| Physical contact/interaction                        | Physical contact or interaction        | Face-to-face                             |                             |                                                     |                                                       |                  |
| Professional/work relationships                     | Professional interaction               | Work related interactions                | Partner Familiarity         | Working relationships                               | Professional interactions                             |                  |
| Personal and social support                         | Social Support                         | Mutual support                           | Mutual understanding        | Socialization                                       | Friendship                                            | Personal support |
