# Supplementary material for: Network approaches and interventions in healthcare settings: A systematic scoping review
Source: PubMed Central journal article supplement (PMC9949682; doi:10.1371/journal.pone.0282050), 2023-02-23
Supplement: pone.0282050.s003.pdf [file pone.0282050.s003.pdf]

**S3 Table. Network Measures**

| <b>Network Measures</b>                 | <b>Words included</b>                                                                                                                                                                                                                                                                           |
|-----------------------------------------|-------------------------------------------------------------------------------------------------------------------------------------------------------------------------------------------------------------------------------------------------------------------------------------------------|
| Density                                 | Network density, inclusiveness.                                                                                                                                                                                                                                                                 |
| Average path length                     | Distance, shortest path length.                                                                                                                                                                                                                                                                 |
| Diameter                                | Network diameter.                                                                                                                                                                                                                                                                               |
| Reciprocity/reciprocation               | Reciprocity, in-degree /out-degree reciprocity.                                                                                                                                                                                                                                                 |
| Centrality Measure                      | Network centrality, degree centrality, closeness centrality, betweenness centrality, number of contacts, first degree centrality, second degree centrality, degree, degree betweenness, eigenvector centrality, betweenness, closeness, indegree centrality, eigenvector, outdegree centrality. |
| Network visualization                   | Visual sociograms, visual network graphs, network graph                                                                                                                                                                                                                                         |
| Exponential Random Graph Models (ERGMs) | Activity/popularity, Assortativity.                                                                                                                                                                                                                                                             |
| Centralization                          | In-degree centralization, flow-betweenness centralization, network centralization.                                                                                                                                                                                                              |
| Group centrality                        | Net degree of team, group betweenness, within-team density, within-team degree centrality, within-team cohesion, average number of ties.                                                                                                                                                        |
| MRQAP/Regression                        | Likelihood of information exchange, strength of collaboration tie.                                                                                                                                                                                                                              |
| Frequency/type of relation              | frequency, type of communication, familiarity.                                                                                                                                                                                                                                                  |
| Core/periphery                          | Coreness, core/periphery structure.                                                                                                                                                                                                                                                             |
| E/I ratio                               | Numbers of internal/external ties, in-group/out-group interactions.                                                                                                                                                                                                                             |
| Geodesic distance                       | Average (geodesic) distance.                                                                                                                                                                                                                                                                    |
| Contribution index                      |                                                                                                                                                                                                                                                                                                 |
| Transitivity                            |                                                                                                                                                                                                                                                                                                 |
| Connectivity                            |                                                                                                                                                                                                                                                                                                 |

|                                        |                                                                 |
|----------------------------------------|-----------------------------------------------------------------|
| Structural holes                       |                                                                 |
| Group density                          | Sub-group cohesion, density by groups, in-group density.        |
| Content analysis/SNA-based text mining | Content analysis.                                               |
| Prestige                               |                                                                 |
| Cliques                                | Clique identification.                                          |
| Clustering                             | Cluster analysis (K-means), clustering, clustering coefficient. |
| Ego-network analysis (peer beliefs)    |                                                                 |
| Diffusion/contagion models             | Regression, diffusion models.                                   |
| SAOMs                                  | Stochastic Actor-Oriented Models.                               |
| Tie strength reciprocity               |                                                                 |
| Group reciprocation                    | Within-team Reciprocation.                                      |
| Hierarchy                              | Network authority                                               |
| Fragmentation                          |                                                                 |
| Isolates                               |                                                                 |
| Brokerage roles                        |                                                                 |
| Agent-based simulation                 |                                                                 |
| Network size                           |                                                                 |
| K-core/k-shell decomposition           | K-shell centrality.                                             |
| Components                             |                                                                 |
